# Supplementary material for: Multifunctional molecularly imprinted nanozymes with improved enrichment and specificity for organic and inorganic trace compounds
Source: Royal Society of Chemistry journal article supplement (doi:10.1039/d3nr03968d), 2024-01-01
Supplement: d3nr03968d1.pdf [file d3nr03968d1.pdf]

1 **Multifunctional Molecularly Imprinted Nanozymes with Improved**  
2 **Enrichment and Specificity for Organic and Inorganic Trace**  
3 **Compounds**

4 Zhanyi Ge, Yilin Zhao\*, Jiayi Li, Zhaobo Si Wenbo Du, Haijia Su\*

5

6

7

8

9 E-mail: [suhj@mail.buct.edu.cn](mailto:suhj@mail.buct.edu.cn); [zhaoyl@mail.buct.edu.cn](mailto:zhaoyl@mail.buct.edu.cn)

10

11

12

**Supporting information**

13

14

15 **Materials**

16

17 Fe<sub>3</sub>O<sub>4</sub> NPs(200 nm, Beijing GiGNano Biointerface Company), tetraethyl  
18 orthosilicate (TEOS, AR grade, Sigma-Aldrich), hydrogen peroxide (30% w/v,  
19 Macklin), Argon gas (AR grade, Beijing Chemical Works), methanol (CP grade,  
20 Macklin), ethylene dimethacrylate (EGDMA, AR grade, Macklin),  
21 azodiisobutyronitrile (AIBN, AR grade, Macklin), Pb(NO<sub>3</sub>)<sub>2</sub>(AR grade, Xilong  
22 Chemical Co.,ltd.), 2-(2-aminophenyl) benzimidazole (AR grade, Aladdin), 4-vinyl  
23 pyridine (4-VP, AR grade, Aladdin), methacrylic acid (MAA, AR grade, Macklin),  
24 acetonitrile (AR grade, Macklin), ethylene diamine tetraacetic acid(EDTA, AR grade,  
25 Fuchen Chemical Reagent Co., Ltd.), glacial acetic acid (AR grade, Beijing Chemical  
26 Works), sodium acetate (AR grade, Fuchen Chemical Reagent Co., Ltd.), 2,2'-azino-  
27 bis(3-ethylbenzothiazoline- 6-sulfonic acid) (ABTS, AR grade, Sigma-Aldrich),  
28 ethanol (98% w/v, Beijing Chemical Works), ammonia solution (25% w/v, Fuchen  
29 Chemical Reagent Co., Ltd.), imidazole (AR grade, Aladdin), dimethylimidazole  
30 (DMI, AR grade, Aladdin), triallyl cyanurate (TAT, AR grade, Aladdin ), 4-  
31 phenoxyphenylacetonitrile (4-PPACN, AR grade, Aladdin), dibutyl phthalate (DBP,  
32 AR grade, Aladdin), diazinon (DIZ, AR grade, Aladdin), hydrofluoric acid (40% w/v,  
33 Macklin), sodium hydroxide (AR grade, Macklin)

34

35

36

37

38

### 39 **Characterization**

40 *Scanning electron microscope (SEM)*. SEM images of the prepared nanoparticles  
41 were collected on a scanning electron microscope (ZEISS GeminiSEM 300, GRE),  
42 with the samples fixed with conductive adhesive and then sprayed with gold.

43 *Transmission electron microscope (TEM)*. Nanoparticles were examined by TEM  
44 (FEI Tecnai F20, USA) using a copper mesh to prepare the samples and ethanol as  
45 dispersant, as well as energy dispersive spectroscopy (EDS).

46 *X-Ray Diffraction (XRD)*. XRD patterns of the prepared NPs were obtained using the  
47 Ultima IV x-ray diffractometer (Rigaku, Japan).

48 *Thermogravimetric Analysis (TGA)*. TG data were obtained by heating from room  
49 temperature to 5500°C at 20°C/min using a thermo gravimetric analyser (SDT Q600,  
50 TA Instruments, USA) under a dynamic N<sub>2</sub> atmosphere.

51 *Fourier transform infrared spectroscopy (FT-IR)*. A Fourier transform infrared  
52 spectrometer Nicolet 6700 (Thermo Fisher, America) was used to analyze the FT-IR  
53 spectrum of Fe<sub>3</sub>O<sub>4</sub> NPs and IIP@void@Fe<sub>3</sub>O<sub>4</sub> nanozymes.

54 Vibrating sample magnetometers (VSM, Lakeshore 7407, USA) were applied to  
55 measure magnetization curves of samples at 2 T magnetic field strength.

56 *X-ray photoelectron spectroscopy (XPS)*. An ESCA PHI500 X-ray photoelectron  
57 spectroscopy apparatus was used to measure the spectra of the adsorbent with and

58 without the target pollutants.

59 *<sup>1</sup>H NMR spectra* was used to analyse the interactions between the Target substrate and  
60 the imprinting sites by chemical shifts of the associated protons. <sup>1</sup>H NMR spectra of  
61 the imprinted polymers were obtained using a Bruker Avance 600 spectrometer  
62 (Bruker Co., Germany). In this context, 4 mM of DIZ, 47 mM of MAA and the  
63 mixture containing 4 mM of DIZ and 47 mM of MAA and 0.4 M of EGDMA and 12  
64 mM of AIBN were dissolved in DMSO, respectively.

65

#### 66 **The preparation process of the IIP@void@Fe<sub>3</sub>O<sub>4</sub>**

67

68 The preparation process of the IIP@void@Fe<sub>3</sub>O<sub>4</sub> for enrichment and  
69 determination of Pb<sup>2+</sup> was similar to that of MIP@void@Fe<sub>3</sub>O<sub>4</sub>. The difference is that,  
70 in step III, an ion imprinted polymer shell is coated on the surface of the modified  
71 SiO<sub>2</sub>@Fe<sub>3</sub>O<sub>4</sub>NPs. Briefly, Pb (NO<sub>3</sub>)<sub>2</sub> (0.0166 g), 2-(2-Aminophenyl) benzimidazole  
72 (Benzenamine) (0.0105 g) and 4-vinyl pyridine (4-vp, 20 μL) were dissolved by 50  
73 mL acetonitrile. The mixture solution was pre-combine for 5 h under stirring. Then  
74 SiO<sub>2</sub>@Fe<sub>3</sub>O<sub>4</sub>NPs (0.06 g), EGDMA (1.5 mL) and AIBN (0.08g) were added into the  
75 solution. The solution was completely and evenly dispersed under ultrasonic  
76 irradiation, followed by stirring at 65 °C under Ar<sub>2</sub> for 24 h. The unpolymerized  
77 monomers and unimprinted templates were removed by washed and magnetically  
78 collected. To elute templates in the imprinted shell, the Fe<sub>3</sub>O<sub>4</sub>@SiO<sub>2</sub>@MIP were  
79 eluated in 50 mL methanol with 0.01 M EDTA and 0.1 M HCl under stirring for 12 h,

80 and the obtained nanozyme were collected magnetically washed after and dried at 60  
81 °C for 3 h. After etched to form the yolk-shell structure, the formed IIP@void@Fe<sub>3</sub>O<sub>4</sub>  
82 nanozymes were collected magnetically washed after and dried at 60 °C for 3 h.

### 83 **Adsorption experiment of Pb<sup>2+</sup>**

84 The adsorption of Pb<sup>2+</sup> was studied by batch experiments, each of which was repeated  
85 three times. In the static adsorption experiment, IIP@void@Fe<sub>3</sub>O<sub>4</sub> nanozymes of the  
86 same quality were dispersed in different concentrations of Pb<sup>2+</sup> solutions. The  
87 solutions were shaken at 300 rpm at 37 °C for a certain time until adsorption  
88 equilibrium. After centrifugation, the concentrations of Pb<sup>2+</sup> were determined by ICP-  
89 MC. In the adsorption kinetics experiments, identical masses of IIP@void@Fe<sub>3</sub>O<sub>4</sub>  
90 nanozymes were dispersed in Pb<sup>2+</sup> solutions of uniform concentration. The  
91 experiments were conducted at 37°C with continuous shaking at 300 rpm for varying  
92 durations, after which the residual Pb<sup>2+</sup> concentration was measured. The adsorption  
93 capacity of Pb<sup>2+</sup> is expressed as adsorption quality (Q), which can be calculated as  
94 follows:

$$95 \quad Q = \frac{(C_0 - C_e) \times V}{M}$$

96 where Q (mg/g) is the equilibrium adsorption quality of IIP@void@Fe<sub>3</sub>O<sub>4</sub> on Pb<sup>2+</sup>,  
97 and C<sub>0</sub> (mg/L) and C<sub>e</sub> (mg/L) are initial and final concentration of Pb<sup>2+</sup> in the solution,  
98 respectively. V (mL) refers to the volume of the sample and M (g) is the weight of  
99 IIP@void@Fe<sub>3</sub>O<sub>4</sub>.

100

### 101 **The detection method of Pb<sup>2+</sup>**

102

103 Gradient concentrations of  $Pb^{2+}$  were assayed as follows:  $Pb^{2+}$  was added into  
104 Hac/NaAc buffer solution (final concentration of 200 mM) to establish experimental  
105 groups of different concentrations. IIP@void@ $Fe_3O_4$  was introduced into these  
106 solutions and shaken for a period of time. After incubation, ABTS solution (final  
107 concentration 0.1 mM) and  $H_2O_2$  solution (final concentration 0.4 mM) were added to  
108 the mixture. The experiments were performed in the dark for a set period. The  
109 absorbance of the solutions was characterized using a TECAN Infinite M200 Pro  
110 multi-function microplate reader. The absorbance of the blank group without  $Pb^{2+}$  was  
111 recorded as  $A_0$ , and the difference between  $A_0$  and the absorbance (A) measured in  
112 the experiment was closely related to the concentration of  $Pb^{2+}$ . For specific detection,  
113 IIP@void@ $Fe_3O_4$  was introduced into a solution of  $Pb^{2+}$  and other metal ions at the  
114 same concentration, and the mixture was shaken for a period of time. After incubation,  
115 ABTS solution (final concentration 0.1 mM) and  $H_2O_2$  solution (final concentration  
116 0.4 mM) were added. After the same detection method, the difference of absorbance  
117 (A) measured in metal ions detection experiment and  $A_0$  reflects the selectivity of the  
118 detection method

119

### 120 **Quantitative detection by smart detection app**

121

122 The solutions in section 2.3 were used for the smart detection app modules to  
123 quantitatively detect the concentration of  $Pb^{2+}$  and DIZ based on RGB color mode.  
124 Specifically, reaction mixtures with different concentrations of  $Pb^{2+}$  ( $1 \times 10^{-8}$ ,  $1 \times 10^{-7}$ ,  
125  $1 \times 10^{-6}$ ,  $1 \times 10^{-5}$ ,  $1 \times 10^{-4}$ ,  $1 \times 10^{-3}$ ,  $1 \times 10^{-2}$  ppm) and DIZ solution ( $1 \times 10^{-4}$ ,  $1 \times 10^{-5}$ ,  $1 \times 10^{-6}$ ,

126  $1 \times 10^{-7}$ ,  $1 \times 10^{-8}$ ,  $1 \times 10^{-9}$ ,  $1 \times 10^{-11}$  M) were collected in colorimetric dishes and captured  
127 using the developed app. Then, based on the RGB color mode analysis was performed  
128 on the obtained brightness values and R, G, B, G/B (green brightness divided by blue  
129 brightness), R/B (red brightness divided by blue brightness), and G/R (green  
130 brightness divided by red brightness) were intelligently calculated. Finally, the  
131 corresponding detection standard curve was established and used for the detection of  
132 actual samples.

133

134

### 135 **The detection method of actual samples**

136 To assess the presence of  $Pb^{2+}$  in actual samples, a specified concentration of  $Pb^{2+}$   
137 standard solution was added to both Industrial wastewater and Kitchen wastewater.  
138 The mixture was then incubated with MIPI nanozymes for 2 hours. Following the  
139 incubation period, ABTS and hydrogen peroxide solutions were introduced, and the  
140 resulting reaction mixture was left to incubate in darkness for 30 minutes, after which  
141 absorbance readings were recorded. The absorbance values were utilized in a linear  
142 detection equation to evaluate the disparities between the detected concentrations and  
143 the actual concentrations of  $Pb^{2+}$ . The Recovery and RSDS (Relative Standard  
144 Deviation of the Signal) were subsequently calculated to assess the accuracy and  
145 precision of the detection method. This methodology aimed to provide insights into  
146 the presence and quantification of  $Pb^{2+}$  in industrial and kitchen wastewater samples.

147

### 148 **Regeneration and reusability study of $Pb^{2+}$**

149 Five cycles of adsorption-elution experiments were performed on IIP@void@Fe<sub>3</sub>O<sub>4</sub>.  
150 In each cycle, 2.5 mg of IIP@void@Fe<sub>3</sub>O<sub>4</sub> nanozyme was introduced into 5 mL of  
151 Pb<sup>2+</sup> solution (5 ppm) and incubated for 2 h. Pb<sup>2+</sup> in supernatant concentrations were  
152 determined by ICP-MC after magnetic recovery. These IIP@void@Fe<sub>3</sub>O<sub>4</sub> nanozymes  
153 were regenerated after washing and drying before the next cycle of the adsorption  
154 experiment.

155



156 **Results and discussion**

157 **Characterization of IIP@void@Fe<sub>3</sub>O<sub>4</sub> nanozyme**

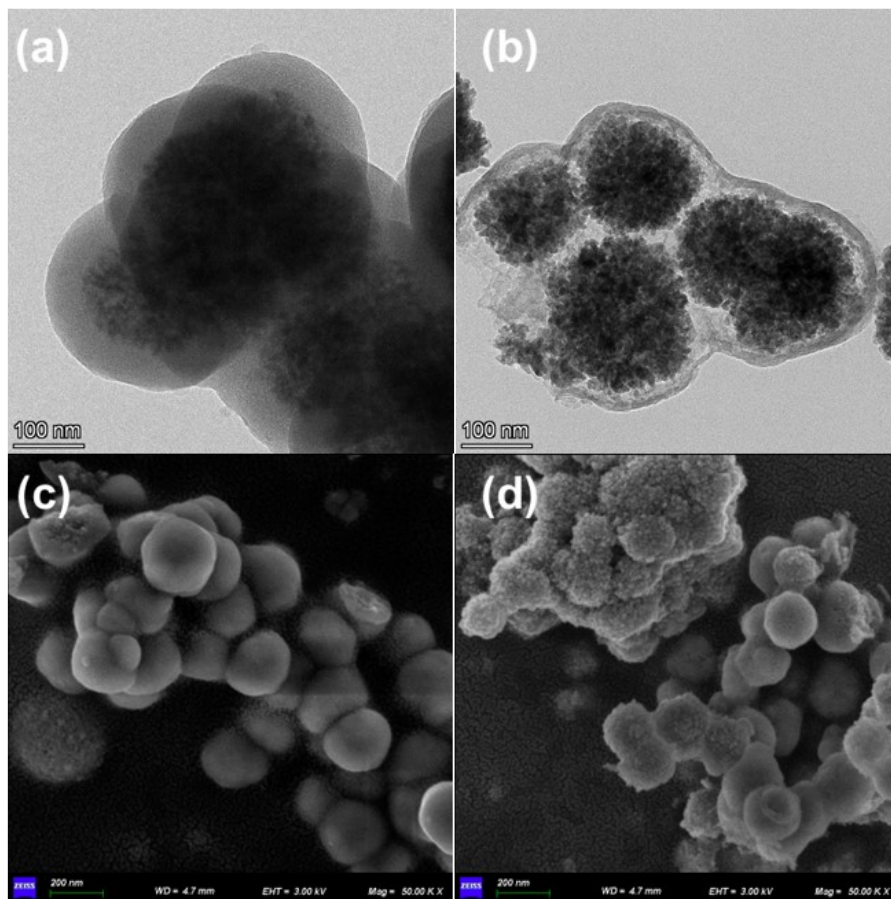

158

159 **Fig.S1** TEM images of (a) NIP@SiO<sub>2</sub>@Fe<sub>3</sub>O<sub>4</sub> and (b) IIP@void@Fe<sub>3</sub>O<sub>4</sub> nanozyme. SEM

160 images of (c) NIP@SiO<sub>2</sub>@Fe<sub>3</sub>O<sub>4</sub> and (d) IIP@void@Fe<sub>3</sub>O<sub>4</sub> nanozyme.

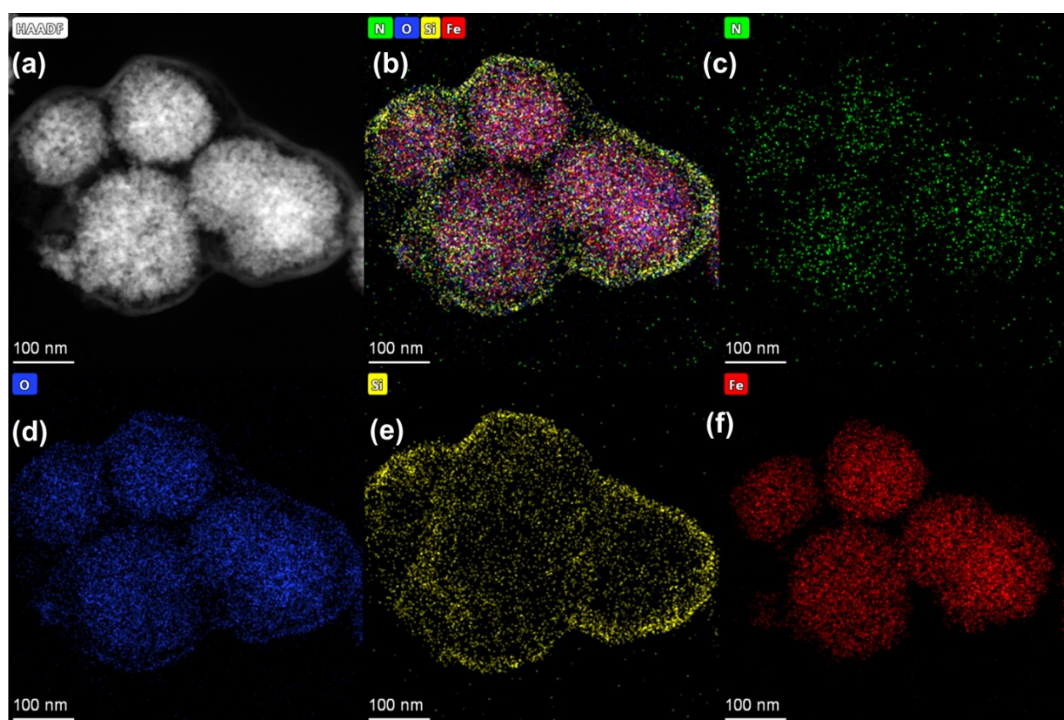

161

162 **Fig. S2** EDX chemical mapping of IIP@void@Fe<sub>3</sub>O<sub>4</sub> nanozyme. (a) HAADF-STEM image  
 163 of the area studied; (b) Superimposition of iron (red), oxygen (blue), silicon (yellow) and  
 164 nitrogen (green) distribution. Distribution of nitrogen (c); the distribution of oxygen (d); the  
 165 distribution of silicon (e); and the distribution of iron (f), respectively.

166

167 Upon comparing Figures S1a and S1b, it is evident that the IIP@void@Fe<sub>3</sub>O<sub>4</sub>  
 168 nanozyme exhibits a distinct hollow structure following the etching of the SiO<sub>2</sub>  
 169 shell. This observation is further corroborated by SEM images. In Figure S1c, the  
 170 NIP@SiO<sub>2</sub>@Fe<sub>3</sub>O<sub>4</sub> appears as a full-bodied sphere. However, Figure S1d reveals  
 171 that the IIP@void@Fe<sub>3</sub>O<sub>4</sub> spheres are not only reduced in size but also exhibit  
 172 partial collapse. This collapse is attributed to the loss of support from the  
 173 imprinted shell during the SiO<sub>2</sub> shell etching process. The elemental distribution

174 maps presented in Figure S2 confirm the successful synthesis of the core-shell  
175 hollow structure in IIP@void@Fe<sub>3</sub>O<sub>4</sub> nanozyme. A clear demarcation between  
176 silicon and iron elements is observed (Figure S2b), further validating the the  
177 hollow layer of the intended nanozyme.  
178

179 Adsorption properties of MIP@void@Fe<sub>3</sub>O<sub>4</sub>

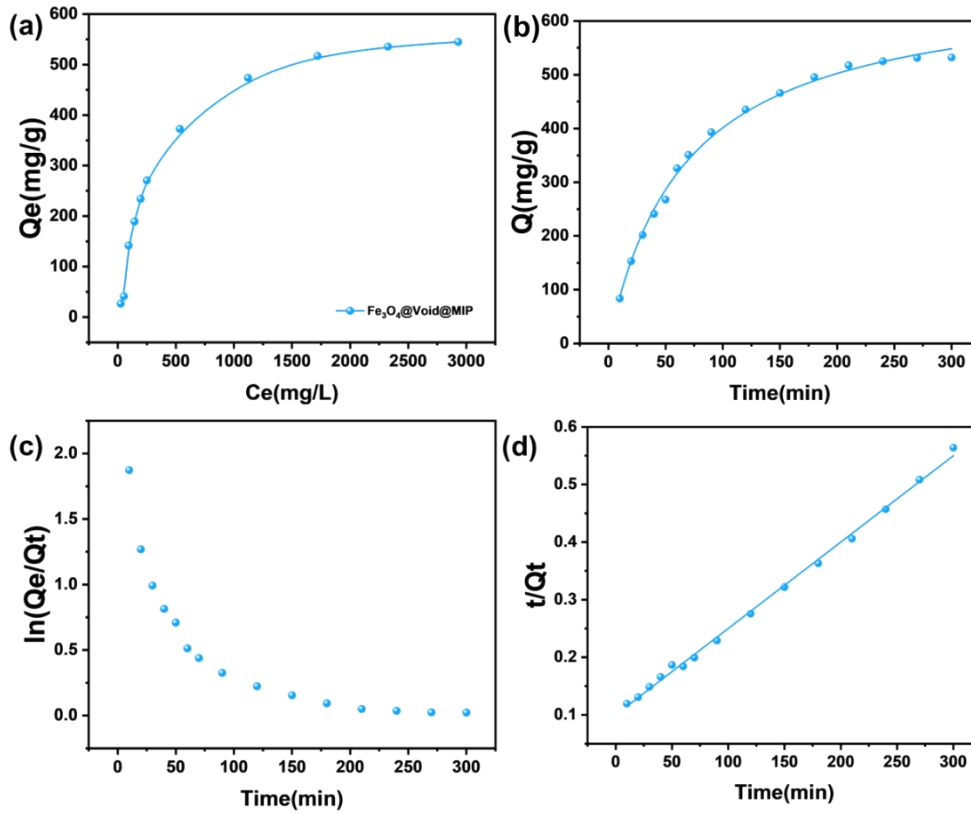

180

181 Fig. S3 (a) Adsorption isotherm of DIZ by MIP@void@Fe<sub>3</sub>O<sub>4</sub>; (b) adsorption kinetic curves of  
 182 DIZ by MIP@void@Fe<sub>3</sub>O<sub>4</sub>; (c) linear plot of Pseudo-first-order model; (d) linear plot of Pseudo-  
 183 second-order model;

184 The adsorption isotherm, as depicted in Figure S3, furnishes pivotal insights into  
 185 the selective adsorption process of DIZ by MIP@void@Fe<sub>3</sub>O<sub>4</sub>. In Fig. S3a, the  
 186 adsorption of MIP@void@Fe<sub>3</sub>O<sub>4</sub> exhibited a rapid increase with escalating initial  
 187 concentrations, reaching saturation at concentrations exceeding 3040 mg/L, in  
 188 accordance with the Langmuir model. Furthermore, Figure S3b illustrated that the  
 189 adsorption of MIP@void@Fe<sub>3</sub>O<sub>4</sub> increased sharply with time, attaining its maximum  
 190 value after 240 minutes, in accordance with a pseudo-second-order kinetic model.  
 191 Figures S3c and S3d present linear curves based on the first-order and pseudo-second-

192 order kinetic models, respectively. The experimental results indicate a clear  
193 conformity of the adsorption kinetics with the pseudo-second-order kinetic model.  
194 The results indicated that the adsorption capacity of MIP@void@Fe<sub>3</sub>O<sub>4</sub> was  
195 influenced by the electron sharing or transfer between adsorbent and adsorbent, and  
196 was mainly affected by chemical adsorption mechanism.  
197

198 **Effect of buffer solution on catalytic oxidation**

199 The colorimetric ability of Fe<sub>3</sub>O<sub>4</sub> nanozymes was investigated in different kinds  
200 of buffer solutions with pH values of 4, and the results are shown in Fig. S1. It was  
201 found that the absorbance of the Hac/NaAc buffer solution at 420 nm was  
202 significantly higher than that of the phosphoric acid buffer solution (PB) and citric  
203 acid/sodium citrate buffer solution at 420 nm. This phenomenon indicated that Fe<sub>3</sub>O<sub>4</sub>  
204 nanozymes showed obvious catalytic capacity in Hac/NaAc buffer solution, but had  
205 weak catalytic capacity in phosphate buffer solution and citric acid/sodium citrate  
206 buffer solution. Therefore, subsequent experiments were conducted in Hac/NaAc  
207 buffer solution.

208

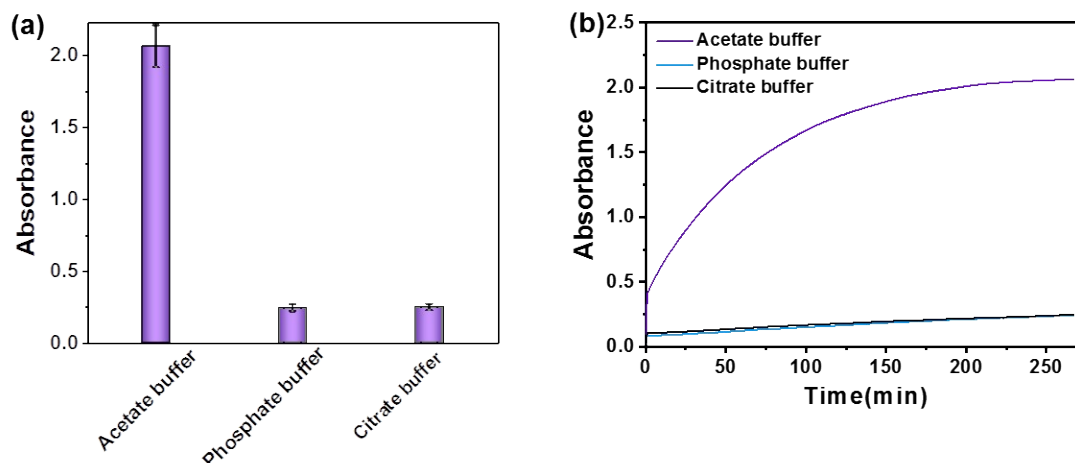

209

210 Fig S4. (a) Absorbance at 420 nm of ABTS oxidized by H<sub>2</sub>O<sub>2</sub> catalyzed by Fe<sub>3</sub>O<sub>4</sub> nanozymes in  
211 different buffer solution environments after 180 min. The final concentration of these buffers was  
212 200 mM. (b) Time-dependent concentration of oxABTS determined for oxidization catalyzed by  
213 Fe<sub>3</sub>O<sub>4</sub> nanozymes at 25 °C. The concentration of ABTS, H<sub>2</sub>O<sub>2</sub> and Fe<sub>3</sub>O<sub>4</sub> nanozymes were 10  
214 mM, 40 mM, and 20mg/mL respectively.

215

216

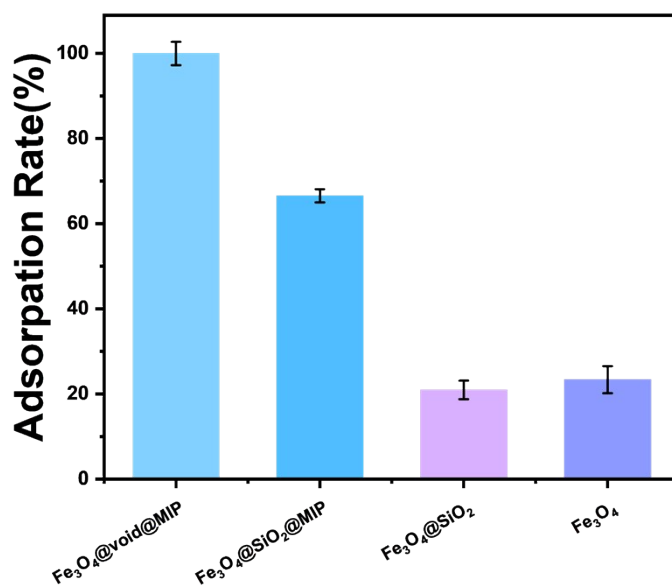

219

220

Fig S5 The adsorption ratio of different particles to DIZ

221 Figure S5 illustrates the adsorption ratios of DIZ by Fe<sub>3</sub>O<sub>4</sub>, Fe<sub>3</sub>O<sub>4</sub>@SiO<sub>2</sub>,  
222 Fe<sub>3</sub>O<sub>4</sub>@SiO<sub>2</sub>@MIP, and MIP@void@Fe<sub>3</sub>O<sub>4</sub>. Interestingly, the trend indicates that  
223 MIP@void@Fe<sub>3</sub>O<sub>4</sub> exhibits a higher adsorption capacity compared to  
224 Fe<sub>3</sub>O<sub>4</sub>@SiO<sub>2</sub>@MIP, Fe<sub>3</sub>O<sub>4</sub>, and Fe<sub>3</sub>O<sub>4</sub>@SiO<sub>2</sub>. This suggests that Fe<sub>3</sub>O<sub>4</sub> itself doesn't  
225 possess a strong adsorption capacity for DIZ. Moreover, the adsorption capacity  
226 appears to decrease after the encapsulation of SiO<sub>2</sub> due to hindered mass transfer.  
227 However, upon the addition of a molecularly imprinted polymer shell, the adsorption  
228 capability notably increases. Additionally, after etching off the SiO<sub>2</sub> shell, the  
229 adsorption capacity further improves. This highlights the efficient adsorption ability  
230 of the molecularly imprinted nanozyme with a core-shell hollow structure for DIZ.  
231 Furthermore, the hollow structure enhances mass transfer, providing more binding  
232 sites for DIZ, consequently enhancing the adsorption ratio.

## 233 XPS survey

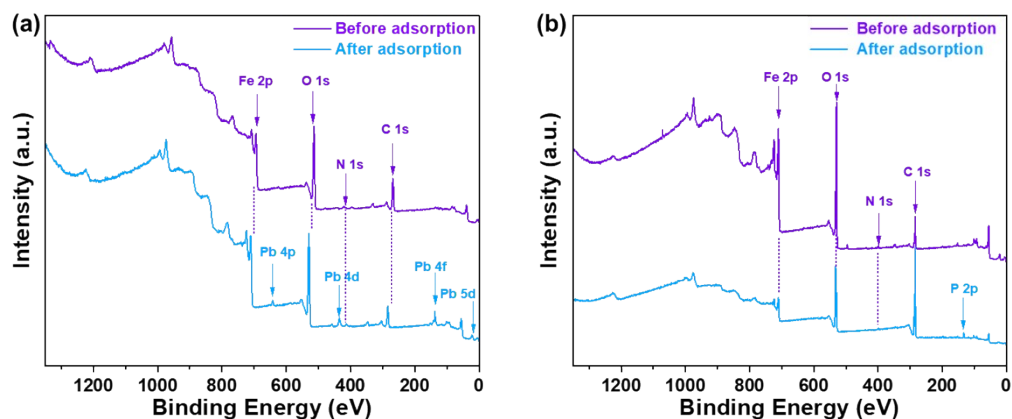

234

235 Fig S6 (a) XPS survey of IIP@void@Fe<sub>3</sub>O<sub>4</sub> before and after Pb<sup>2+</sup> adsorption, (b) XPS survey of  
236 MIP@void@Fe<sub>3</sub>O<sub>4</sub> before and after DIZ adsorption

237 Figure S6(a) in the XPS spectrum clearly exhibits characteristic peaks of Pb 4p,

238 Pb 4d, Pb 4f, and Pb 5d, indicating the successful adsorption of Pb by

239 MIP@void@Fe<sub>3</sub>O<sub>4</sub>. Similarly, Figure S6(b) shows the appearance of a characteristic

240 peak of P 2p in the XPS spectrum after the adsorption of DIZ by MIP@void@Fe<sub>3</sub>O<sub>4</sub>.

241 Considering that only DIZ in our sample contains phosphorus (P), this confirms the

242 successful adsorption of DIZ by our molecularly imprinted nanozyme.

243

244



245 **Michaelis-Menten plot for H<sub>2</sub>O<sub>2</sub> oxidation by MIP@void@Fe<sub>3</sub>O<sub>4</sub>,**  
246 **NIP@void@Fe<sub>3</sub>O<sub>4</sub>, SiO<sub>2</sub>@Fe<sub>3</sub>O<sub>4</sub> and Fe<sub>3</sub>O<sub>4</sub>**

247 The comparative analysis of peroxidase-like activity among different nanozymes,  
248 as illustrated in Fig S7 and Table S1, reveals that the amino-modified Fe<sub>3</sub>O<sub>4</sub>  
249 nanozymes exhibit the highest peroxidase activity. The encapsulation with a silica  
250 (SiO<sub>2</sub>) shell notably inhibits both the peroxidase activity and substrate affinity of these  
251 nanozymes. However, a significant enhancement in peroxidase activity is observed  
252 upon etching away the SiO<sub>2</sub> shell, bringing the activity level on par with that of the  
253 original Fe<sub>3</sub>O<sub>4</sub> nanozymes. This enhancement aligns with the design rationale of our  
254 study; removing the SiO<sub>2</sub> shell substantially improves the mass transfer efficiency of  
255 hydrogen peroxide, thereby augmenting the catalytic peroxidase activity of the  
256 nanozymes. This finding underscores the efficacy of our structural design in  
257 optimizing enzymatic function.

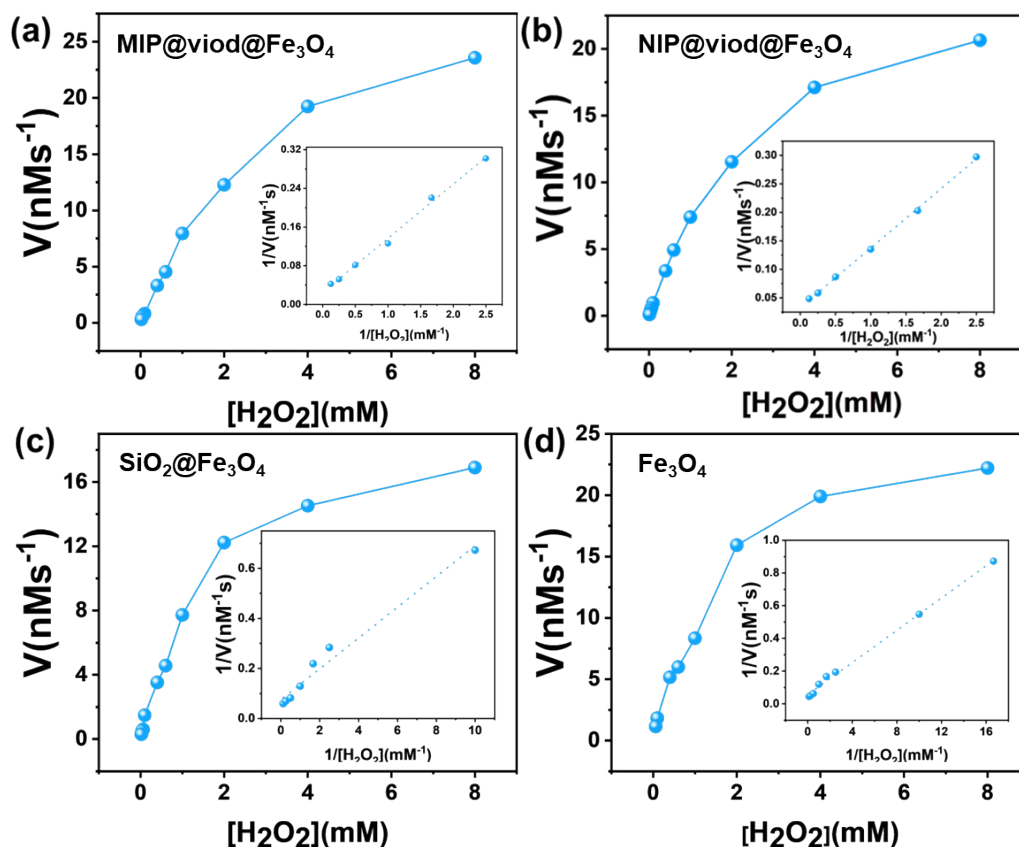

258

259 Fig S7 Michaelis-Menten plot for  $\text{H}_2\text{O}_2$  oxidation by MIP@void@ $\text{Fe}_3\text{O}_4$ (a), NIP@void@ $\text{Fe}_3\text{O}_4$ (b),  
 260  $\text{SiO}_2$ @ $\text{Fe}_3\text{O}_4$ (c) and  $\text{Fe}_3\text{O}_4$ (d)

261

262 **Table S1.** Comparison of  $K_m$  and  $V_{max}$  for IIP@void@ $\text{Fe}_3\text{O}_4$ , MIP@void@ $\text{Fe}_3\text{O}_4$ ,  
 263 NIP@void@ $\text{Fe}_3\text{O}_4$ ,  $\text{SiO}_2$ @ $\text{Fe}_3\text{O}_4$  and  $\text{Fe}_3\text{O}_4$  NPs

264

| Sample                                   | $V_{max}$ ( $10^{-9}\text{M/s}$ ) | $K_m$ (mM) | Ref.     |
|------------------------------------------|-----------------------------------|------------|----------|
| HRP                                      | 0.689                             | 10.35      | [1]      |
| $\text{Fe}_3\text{O}_4$                  | 33.14                             | 2.75       | Our work |
| $\text{Fe}_3\text{O}_4$ @ $\text{SiO}_2$ | 25.813                            | 2.84       | Our work |
| NIP@void@ $\text{Fe}_3\text{O}_4$        | 30.28                             | 3.16       | Our work |
| IIP@void@ $\text{Fe}_3\text{O}_4$        | 30.02                             | 3.01       | Our work |
| MIP@void@ $\text{Fe}_3\text{O}_4$        | 33.26                             | 3.22       | Our work |

266 **Comparison of actual sample test parameters**

267

268

**Table S2.** Selective detection methods of Pb<sup>2+</sup> and pesticide in environmental samples

| Substance  | Detection Method                                 | LOD                       | Testing sample              | Ref.     |
|------------|--------------------------------------------------|---------------------------|-----------------------------|----------|
| Pb         | HR-CS FAAS                                       | 0.24 µg L <sup>-1</sup>   | Water, cola and fruit juice | [2]      |
| Pb         | Electrochemical biosensors                       | 4.76 µg L <sup>-1</sup>   | Water                       | [3]      |
| Pb         | DNA-Catalyzed Porphyrin Metalation               | 4.75 µg L <sup>-1</sup>   | Water                       | [4]      |
| Pb         | Ion-imprinted fluorescence probe                 | 5.25 µg L <sup>-1</sup>   | Water                       | [5]      |
| Pb         | Bionic ion imprinted nanozyme                    | 0.0097 µg L <sup>-1</sup> | Water                       | Our work |
| Glyphosate | HPLC-MS                                          | 0.25 µg/L                 | Water                       | [6]      |
| Terbufos   | FPSE/GC-MS                                       | 0.033 µg/L                | Agricultural products       | [7]      |
| Glyphosate | Immunosensor fluorescence magnetic nanoparticles | 0.055 µg L <sup>-1</sup>  | Agricultural products       | [8]      |
| Malathion  | AChE-CS/3DG-CuO NFs                              | 310 µg L <sup>-1</sup>    | Water                       | [9]      |
| Parathion  | Origami paper-based electrochemical biosensor    | 2 µg L <sup>-1</sup>      | Water                       | [10]     |
| DIZ        | FL-AChE-ATCh-UCNPs-Cu                            | 0.05 µg/L <sup>-1</sup>   | Water                       | [11]     |
| DIZ        | Bionic molecular imprinted nanozyme              | 0.030 µg L <sup>-1</sup>  | Water                       | Our work |

## Reference

- [1] K. Fan, H. Wang, J. Xi, Q. Liu, X. Meng, D. Duan, L. Gao, X. Yan, Optimization of Fe<sub>3</sub>O<sub>4</sub> nanozyme activity via single amino acid modification mimicking an enzyme active site, *Chemical Communications*, 53 (2016).
- [2] H. Ciftci, C. Er, O. Yalcinkaya, M.M. Temuz, A.R. Turker, High-resolution continuum source flame atomic absorption spectrometric (HR-CS FAAS) determination of trace aluminium and lead in water and some beverage samples after separation and preconcentration procedure, *International Journal of Environmental Analytical Chemistry*, 94 (2014) 579–593.
- [3] J. Guo, H. Huang, M. Zhou, C. Yang, L. Kong, Quantum Dots-Doped Tapered Hydrogel Waveguide for Ratiometric Sensing of Metal Ions, *Anal Chem*, 90 (2018) 12292–12298.
- [4] D. Peng, Y. Li, Z. Huang, R.-P. Liang, J.-D. Qiu, J. Liu, Efficient DNA-Catalyzed Porphyrin Metalation for Fluorescent Ratiometric Pb<sup>2+</sup> Detection, *Analytical Chemistry*, 91 (2019) 11403–11408.
- [5] H. Lu, C. Yu, S. Xu, A dual reference ion-imprinted ratiometric fluorescence probe for simultaneous detection of silver (I) and lead (II), *Sensors and Actuators B: Chemical*, 288 (2019) 691–698.
- [6] Elena, Okada, Timothy, Coggan, Tarun, Anumol, Bradley, Clarke, Graeme, Allinson, A simple and rapid direct injection method for the determination of glyphosate and AMPA in environmental water samples, *ANALYTICAL AND BIOANALYTICAL CHEMISTRY*, (2018).
- [7] R. Kaur, R. Kaur, S. Rani, A.K. Malik, A. Kabir, K.G. Furton, Application of fabric phase sorptive extraction with gas chromatography and mass spectrometry for the determination of organophosphorus pesticides in selected vegetable samples, *Journal of Separation Science*, 42 (2019).
- [8] H.U. Lee, D.U. Jung, J.H. Lee, Y.S. Song, C. Park, S.W. Kim, Detection of glyphosate by quantitative analysis of fluorescence and single DNA using DNA-labeled fluorescent magnetic core-shell nanoparticles, *Sensors & Actuators B Chemical*, 177 (2013) 879–886.
- [9] J. Bao, T. Huang, Z. Wang, H. Yang, C. Hou, 3D Graphene/Copper Oxide Nanoflowers Based Acetylcholinesterase Biosensor for Sensitive Detection of Organophosphate Pesticides, *Sensors and Actuators B Chemical*, 279 (2018).
- [10] Arduini, Cinti, Caratelli, Amendola, Palleschi, Moscone, Origami multiple paper-based electrochemical biosensors for pesticide detection, *Biosensors & Bioelectronics*, (2018).
- [11] P. Wang, H. Li, M.M. Hassan, Z. Guo, Z.Z. Zhang, Q. Chen, Fabricating an Acetylcholinesterase Modulated UCNPs-Cu<sup>2+</sup> Fluorescence Biosensor for Ultrasensitive Detection of Organophosphorus Pesticides-Diazinon in Food, *Journal of Agricultural and Food Chemistry*, (2019).
